# Supplementary material
Source: MDPI journal article supplement (https://www.mdpi.com/1424-2818/15/10/1035)
Supplement: s1 [file s1]

**Table S1.** List of samples obtained for the study.

| <b>Subspecies of<br/><i>Ara militaris</i></b> | <b>Locality</b>           | <b>Tissue<br/>type</b> | <b>Number of specimens<br/>of ANMH</b> | <b>GenBank ID</b> |
|-----------------------------------------------|---------------------------|------------------------|----------------------------------------|-------------------|
| <i>A. m. mexicanus</i>                        | Jalisco; Los Masos        | Toe pads               | SKIN105359                             | KT957217          |
| <i>A. m. mexicanus</i>                        | Jalisco; Los Masos        | Toe pads               | SKIN105360                             | KT957209          |
| <i>A. m. mexicanus</i>                        | Jalisco; Volcán de Colima | Toe pads               | SKIN105361                             | KT957221          |
| <i>A. m. mexicanus</i>                        | Jalisco; Volcán de Colima | Toe pads               | SKIN105362                             | KT957222          |
| <i>A. m. mexicanus</i>                        | Jalisco; Volcán de Colima | Toe pads               | SKIN804990                             | KT957221          |
| <i>A. m. mexicanus</i>                        | Jalisco; Volcán de Colima | Toe pads               | SKIN105363                             | KT957218          |
| <i>A. m. mexicanus</i>                        | Jalisco; Volcán de Colima | Toe pads               | SKIN105364                             | KT957224          |
| <i>A. m. mexicanus</i>                        | Jalisco; Volcán de Colima | Toe pads               | SKIN105365                             | KT957226          |
| <i>A. m. mexicanus</i>                        | Jalisco; Las Peñas        | Toe pads               | SKIN393338                             | KT957210          |
| <i>A. m. mexicanus</i>                        | Jalisco; Las Peñas        | Toe pads               | SKIN393339                             | KT957214          |
| <i>A. m. mexicanus</i>                        | Jalisco; Las Peñas        | Toe pads               | SKIN393340                             | KT957223          |
| <i>A. m. mexicanus</i>                        | Jalisco; Las Peñas        | Toe pads               | SKIN393341                             | KT957219          |
| <i>A. m. mexicanus</i>                        | Jalisco; Bahía Balderas   | Toe pads               | SKIN474241                             | KT957215          |
| <i>A. m. mexicanus</i>                        | Jalisco; Bahía Balderas   | Toe pads               | SKIN474242                             | KT957216          |
| <i>A. m. mexicanus</i>                        | Nayarit; Barranca del Oro | Toe pads               | SKIN474243                             | KT957211          |
| <i>A. m. mexicanus</i>                        | Nayarit; Barranca del Oro | Toe pads               | SKIN474244                             | KT957212          |
| <i>A. m. mexicanus</i>                        | Nayarit; Tuxpan           | Toe pads               | SKIN474245                             | KT957213          |
| <i>A. m. mexicanus</i>                        | Nayarit; Tecuala          | Toe pads               | SKIN704427                             | KT957225          |
| <i>A. m. mexicanus</i>                        | Sonora;                   | Feathers               | ISOLMPSA1                              | KT957246          |

|                        |                                   |          |            |          |
|------------------------|-----------------------------------|----------|------------|----------|
| <i>A. m. mexicanus</i> | Álamos<br>Sinaloa;<br>Cósala      | Feathers | ISOLMPNM1  | KT957252 |
| <i>A. m. mexicanus</i> | Sinaloa;<br>Cósala                | Feathers | ISOLMPNM2  | KT957257 |
| <i>A. m. mexicanus</i> | Sinaloa;<br>Cósala                | Feathers | ISOLMPNM11 | KT957262 |
| <i>A. m. mexicanus</i> | Sinaloa;<br>Cósala                | Feathers | ISOLMPNM16 | KT957263 |
| <i>A. m. mexicanus</i> | Sinaloa;<br>Cósala                | Feathers | ISOLMPNM12 | KT957264 |
| <i>A. m. mexicanus</i> | Sinaloa;<br>Cósala                | Feathers | ISOLMPNM23 | KT957265 |
| <i>A. m. mexicanus</i> | Sinaloa;<br>Cósala                | Feathers | ISOLMPNM14 | KT957266 |
| <i>A. m. mexicanus</i> | Sinaloa;<br>Cósala                | Feathers | ISOLMPNM19 | KT957267 |
| <i>A. m. mexicanus</i> | Sinaloa;<br>Cósala                | Feathers | ISOLMPNM10 | KT957268 |
| <i>A. m. mexicanus</i> | Sinaloa;<br>Cósala                | Feathers | ISOLMPNM3  | KT957269 |
| <i>A. m. mexicanus</i> | Sinaloa;<br>Cósala                | Feathers | ISOLMPNM22 | KT957270 |
| <i>A. m. mexicanus</i> | Sinaloa;<br>Cósala                | Feathers | ISOLMPNM6  | KT957271 |
| <i>A. m. mexicanus</i> | Sinaloa;<br>Cósala                | Feathers | ISOLMPNM15 | KT957272 |
| <i>A. m. mexicanus</i> | Sinaloa;<br>Cósala                | Feathers | ISOLMPNM18 | KT957273 |
| <i>A. m. mexicanus</i> | Sinaloa;<br>Cósala                | Feathers | ISOLMPNM20 | KT957274 |
| <i>A. m. mexicanus</i> | Sinaloa;<br>Cósala                | Feathers | ISOLMPNM5  | KT957275 |
| <i>A. m. mexicanus</i> | Nayarit;<br>Mirador del<br>Águila | Feathers | ISOLMPMA1  | KT957249 |
| <i>A. m. mexicanus</i> | Nayarit;<br>Mirador del<br>Águila | Feathers | ISOLMPMA2  | KT957250 |
| <i>A. m. mexicanus</i> | Nayarit;<br>Mirador del<br>Águila | Feathers | ISOLMPMA3  | KT957253 |
| <i>A. m. mexicanus</i> | Nayarit;<br>Mirador del<br>Águila | Feathers | ISOLMPMA4  | KT957254 |
| <i>A. m. mexicanus</i> | Nayarit;<br>Mirador del<br>Águila | Feathers | ISOLMPMA5  | KT957258 |
| <i>A. m. mexicanus</i> | Jalisco;<br>Tuito                 | Feathers | ISOLMPET1  | KT957255 |

|                         |                                   |          |            |          |
|-------------------------|-----------------------------------|----------|------------|----------|
| <i>A. m. mexicanus</i>  | Jalisco;<br>Tuito                 | Feathers | ISOLMPET2  | KT957256 |
| <i>A. m. mexicanus</i>  | Jalisco;<br>Tuito                 | Feathers | ISOLMPET3  | KT957260 |
| <i>A. m. mexicanus</i>  | Jalisco;<br>Tuito                 | Feathers | ISOLMPET4  | KT957261 |
| <i>A. m. mexicanus</i>  | Oaxaca;<br>Tecomavaca             | Feathers | ISOLMPST1  | KT957247 |
| <i>A. m. mexicanus</i>  | Oaxaca;<br>Tecomavaca             | Feathers | ISOLMPST2  | KT957248 |
| <i>A. m. mexicanus</i>  | Oaxaca;<br>Tecomavaca             | Feathers | ISOLMPST4  | KT957251 |
| <i>A. m. mexicanus</i>  | Oaxaca;<br>Tecomavaca             | Feathers | ISOLMPST5  | KT957259 |
| <i>A. m. mexicanus</i>  | Querétaro;<br>Sotáno del<br>Barro | Feathers | ISOLMGSB1  | KT957241 |
| <i>A. m. mexicanus</i>  | Querétaro;<br>Sotáno del<br>Barro | Feathers | ISOLMGSB2  | KT957243 |
| <i>A. m. mexicanus</i>  | Tamaulipas;<br>El Cielo           | Feathers | ISOLMGEC1  | KT957242 |
| <i>A. m. mexicanus</i>  | Tamaulipas;<br>El Cielo           | Feathers | ISOLMGEC2  | KT957244 |
| <i>A. m. mexicanus</i>  | Tamaulipas;<br>El Cielo           | Feathers | ISOLMGEC3  | KT957245 |
| <i>A. m. militaris</i>  | Colombia;<br>Santa Marta          | Toe pads | SKIN474233 | 1864685  |
| <i>A. m. militaris</i>  | Colombia;<br>Santa Marta          | Toe pads | SKIN474234 | 1864685  |
| <i>A. m. militaris</i>  | Colombia;<br>Bogotá               | Toe pads | SKIN474240 | 1864685  |
| <i>A. m. militaris</i>  | Colombia;<br>Bogotá               | Toe pads | SKIN474235 | 1864685  |
| <i>A. m. militaris</i>  | Colombia;<br>Bogotá               | Toe pads | SKIN833892 | 1864685  |
| <i>A. m. militaris</i>  | Perú; Loreta                      | Toe pads | SKIN474236 | 1864685  |
| <i>A. m. militaris</i>  | Perú; Loreta                      | Toe pads | SKIN474237 | 1864685  |
| <i>A. m. militaris</i>  | Perú; Loreta                      | Toe pads | SKIN474238 | 1864685  |
| <i>A. m. militaris</i>  | Perú; Loreta                      | Toe pads | SKIN474239 | 1864685  |
| <i>A. m. bolivianus</i> | Bolivia; Sara                     | Toe pads | SKIN474227 | 1864685  |
| <i>A. m. bolivianus</i> | Bolivia; Sara                     | Toe pads | SKIN474228 | 1864685  |
| <i>A. m. bolivianus</i> | Bolivia; Sara                     | Toe pads | SKIN474229 | 1864685  |
| <i>A. m. bolivianus</i> | Bolivia; Sara                     | Toe pads | SKIN474230 | 1864685  |
| <i>A. m. bolivianus</i> | Bolivia; Sara                     | Toe pads | SKIN474231 | 1864685  |
| <i>A. m. bolivianus</i> | Bolivia; Sara                     | Toe pads | SKIN474232 | 1864685  |

AMNH = American Museum Natural History

*A. m. mexicanus* = Distributed in Mexico

*A. m. militaris* = Distributed in Venezuela, Colombia, Ecuador and Perú

*A. m. bolivianus* = Distributed in Bolivia and Argentina

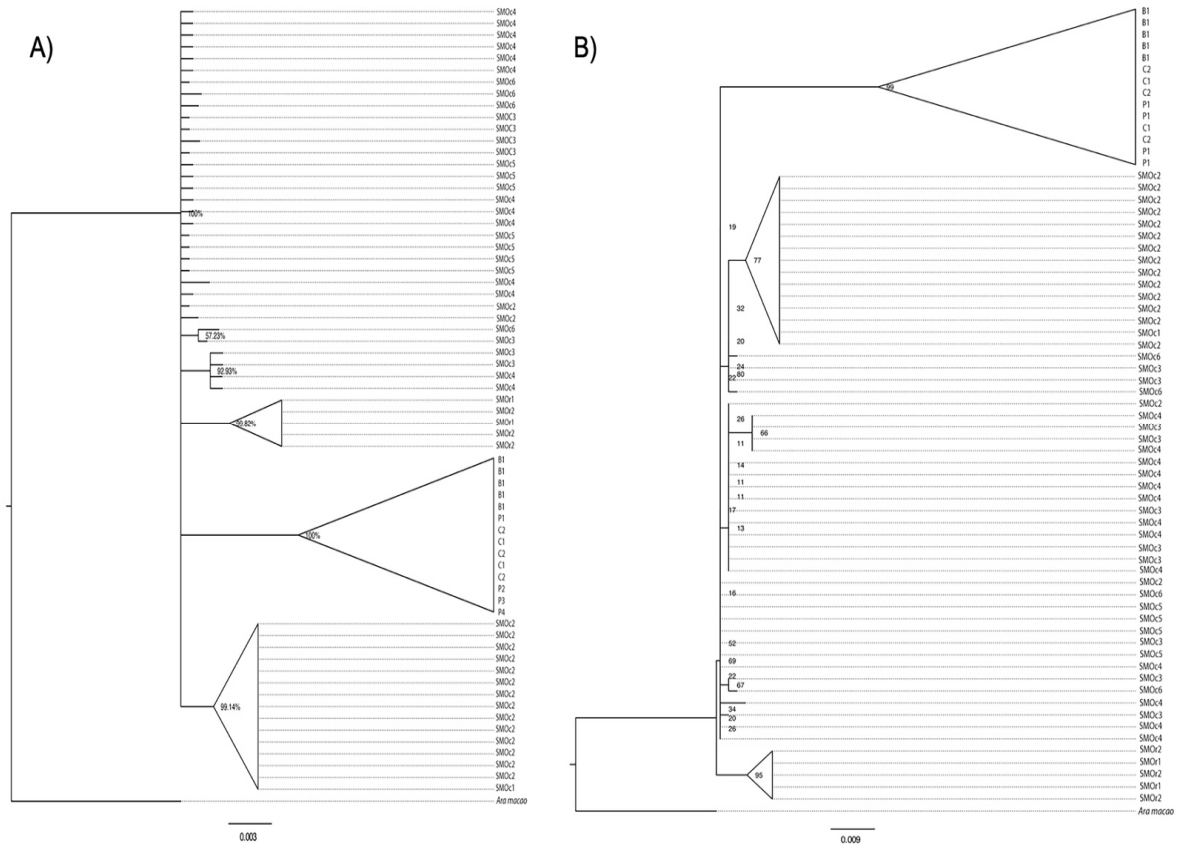

**Figure S1.** We constructed mtDNA phylogenetic trees based on a *Cyt-b* gene data set consisting of more than 300 base pairs, with a single outgroup species (*Ara macao*). **(A)** maximum likelihood (ML) approach and **(B)** The Bayesian inference (BI) approach were employed in our analysis, including 68 terminals and 582 positions. SMOc1 to 6 = Mexico-Sierra Madre Occidental/Sierra Madre del Sur, SMOs1 to 2 = Mexico-Sierra Madre Oriental. C1 to 2 = Colombia, P1 = Peru, and B1 = Bolivia.
